# Supplementary material
Source: ML conference proceedings conference paper supplement (https://openreview.net/forum?id=IloMJ5rqfnt)
Supplement: supplementary_material [file attachment]

# SUPPLEMENTARY MATERIAL: ACCURATE IMAGE RESTORATION WITH ATTENTION RETRACTABLE TRANSFORMER

Jiale Zhang<sup>1</sup>, Yulun Zhang<sup>2\*</sup>, Jinjin Gu<sup>3,4</sup>, Yongbing Zhang<sup>5</sup>, Linghe Kong<sup>1\*</sup>, Xin Yuan<sup>6</sup>

<sup>1</sup>Shanghai Jiao Tong University, <sup>2</sup>ETH Zürich, <sup>3</sup>Shanghai AI Laboratory,

<sup>4</sup>The University of Sydney, <sup>5</sup>Harbin Institute of Technology (Shenzhen), <sup>6</sup>Westlake University

## APPENDIX

**Summary.** This appendix provides some vital analyses and additional experimental results. Firstly, we present more experimental results about the ablation study in Sec. 1. Secondly, we give detailed discussion and verification about the differences between our method and the related works in Sec. 2. Thirdly, we provide the comparative results on two other tasks: real image denoising in Sec. 3 and Gaussian grayscale image denoising on Sec. 4. Lastly, we provide more quantitative and visual comparisons about our method in Sec. 5.

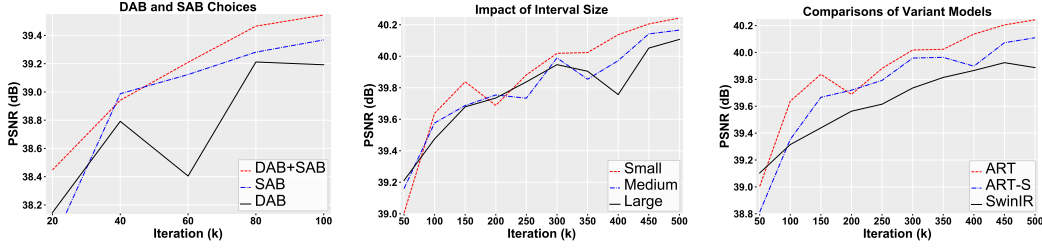

Figure 1: **Left:** PSNR (dB) comparison of our ART using all dense attention block (DAB), using all sparse attention block (SAB), and using alternating DAB and SAB. **Middle:** PSNR (dB) comparison of our ART using large interval size in sparse attention block which is (8, 8, 8, 8, 8, 8) for six residual groups, using medium interval size which is (8, 8, 6, 6, 4, 4), and using small interval size which is (4, 4, 4, 4, 4, 4). **Right:** PSNR (dB) comparison of SwinIR, ART-S, and ART. Note that all the PSNR results are obtained by testing on another benchmark dataset Manga109 under  $\times 2$  SR.

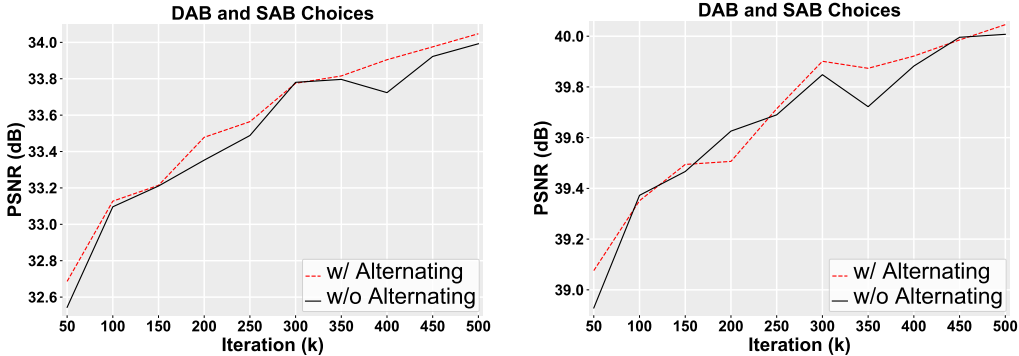

Figure 2: PSNR (dB) comparison of our ART using 3 pairs of alternating dense attention block (DAB) and sparse attention block (SAB), and using 3 successive SABs following 3 successive CABs. The former is with (“w/”) alternating and the latter is without (“w/o”) alternating. The **left** figure shows the testing results on Urban100 and the **right** one shows the testing results on Manga109.

\*Corresponding authors: Yulun Zhang, yulun100@gmail.com; Linghe Kong, linghe.kong@sjtu.edu.cn

## 1 SUPPLEMENTARY ABLATION STUDY

We provide additional experimental results for ablation study. We train our models for ( $\times 2$ ) image super-resolution (SR) based on DIV2K [Timofte et al. \(2017\)](#) and Flicke2K [Lim et al. \(2017\)](#) datasets.

**Design Choices for DAB and SAB.** We set two different experiment conditions about the application of dense attention block (DAB) and sparse attention block (SAB). The first one is using 3 successive SABs following 3 successive CABs in each residual group module. The second one is using 3 pairs of alternating DAB and SAB. We keep else experiment setting the same and train these two models for 500k iterations. Fig. 2 shows the PSNR results on Urban100 and Manga109. We can see that the model with alternating DAB and SAB structure achieves better performance. It is mainly because that the alternating application of these two blocks enables residual group module to obtain local and global receptive field simultaneously. While, successive DABs and SABs structure has limited ability to capture wider receptive fields and thus shows poor performance. Besides, we provide more results to compare models with different blocks. As shown in Fig. 1(Left), the evaluation results on Manga109 also validate that the simultaneous usage of DAB and SAB is necessary.

**Impact of Interval Size.** We provide more comparisons about the models with different interval size settings. In detail, we evaluate the corresponding models that have been introduced in Ablation study of the main paper on Manga109. The results are shown in Fig. 1(Middle). As we can see, smaller intervals in our model bring more performance gains.

**Comparisons of Variant Models.** We provide a new version of our model for fair comparisons and name it ART-S. Different from ART, the MLP ratio in ART-S is set to 2 and the interval size is set to 8. We aim to keep the same computation cost with SwinIR in training phase. It is known that the input training image size is  $64 \times 64$  and the window size of SwinIR is 8. Therefore, our sparse attention module will not introduce additional computational cost by extracting the same  $8 \times 8$  tokens with SwinIR. In practice, our ART-S has the same Mult-Adds with SwinIR (e.g., 51.3G) when training for ( $\times 2$ ) image SR. We show PSNR comparison on Manga109 datasets as the training iterations increase in Fig. 1(Right). It further demonstrates that our ART-S outperforms SwinIR. Compared with SwinIR, our ART-S does not introduce additional computational cost in training phase but achieves better performance. It is validated to be new promising Transformer-based network.

## 2 DISCUSSION OF RELATED WORKS

As the core component of Transformer, self-attention module plays an important role in modeling long-range dependencies. Since our proposed method achieves promising performance, the sparse attention has been validated to be effective in dealing with low-level vision tasks. To demonstrate the differences, we compare our method to the usage of sparse attention in related works. Specially, we consider CrossFormer [Wang et al. \(2022a\)](#) as a representative work. We give detailed analysis and comparisons in the following parts.

### 2.1 COMPARISONS WITH CROSSFORMER

Inspired by recent local window self-attention scheme proposed by Swin Transformer [Liu et al. \(2021\)](#), CrossFormer proposed Cross-scale Embedding Layer (CEL) and Long Short Distance Attention (LSDA) for high-level vision tasks. In our paper, we proposed sparse attention modules for low-level vision tasks, e.g., image SR, denoising and image compression artifact reduction. We compare these two methods as follows.

**Different Tasks.** Different tasks have different requirements. The purpose of our method is to recover as more high-frequency information of original images as possible. Meanwhile, we directly forward the low-frequency information of LR images to the final HR outputs. Take image denoising as an example. We want to learn the real noise and remove it while retaining original image details. However, the purpose of CrossFormer is to make dense prediction. By contrast, the sparse attention modules in our network focus on pixel-level information while the long-distance attention modules in CrossFormer focus on the semantic-level information.

**Different Model Architectures.** CrossFormer has a pyramid structure, like most ViT backbones. The downsampling become a basic operation to reduce the computational cost. As the layer in CrossFormer becomes deeper, the interval of sparse tokens becomes smaller and the channel dimension becomes larger. This pyramid structure enables the whole model to focus on the semantic-level

| Method      | scale      | Set5         |               | Set14        |               | B100         |               | Urban100     |               | Manga109     |               |
|-------------|------------|--------------|---------------|--------------|---------------|--------------|---------------|--------------|---------------|--------------|---------------|
|             |            | PSNR         | SSIM          |
| CrossFormer | $\times 2$ | 38.20        | 0.9613        | 34.04        | 0.9228        | 32.32        | 0.9017        | 32.91        | 0.9358        | 39.28        | 0.9785        |
| ART-S       | $\times 2$ | <b>38.39</b> | <b>0.9622</b> | <b>34.33</b> | <b>0.9253</b> | <b>32.49</b> | <b>0.9038</b> | <b>33.70</b> | <b>0.9415</b> | <b>39.88</b> | <b>0.9800</b> |

Table 1: Quantitative comparison (PSNR (dB)/SSIM) of CrossFormer and ART-S under  $\times 2$  SR task with training 300k iterations, while the total training iterations are 500k

| Method  | MIRNet |       | Uformer-S |       | Uformer-B |       | Restormer    |              | ART (ours)   |              | ART+ (ours)  |              |
|---------|--------|-------|-----------|-------|-----------|-------|--------------|--------------|--------------|--------------|--------------|--------------|
| Metrics | PSNR   | SSIM  | PSNR      | SSIM  | PSNR      | SSIM  | PSNR         | SSIM         | PSNR         | SSIM         | PSNR         | SSIM         |
| SIDD    | 39.72  | 0.959 | 39.77     | 0.959 | 39.89     | 0.960 | <b>40.02</b> | <b>0.960</b> | 39.96        | 0.960        | <b>39.99</b> | <b>0.960</b> |
| DND     | 39.88  | 0.956 | 39.96     | 0.956 | 40.04     | 0.956 | 40.03        | 0.956        | <b>40.05</b> | <b>0.956</b> | <b>40.08</b> | <b>0.956</b> |
| Params  | 31.79M |       | 20.63M    |       | 50.88M    |       | 26.13M       |              | 25.70M       |              | 25.70M       |              |

Table 2: Quantitative comparison (PSNR (dB)/SSIM) with state-of-the-art methods for real image denoising. Best and second best results are colored with red and blue.

information. By contrast, our method does not use downsampling. We keep the size of feature map unchanged. It enables our model to focus on pixel-level information. Besides, we use long-distance residual connection to reserve low-frequency information.

**Different Roles of Sparse Attention.** CrossFormer uses long-distance attention to build interactions of multi-scale features. Our method uses sparse attention to build interactions of equal-scale features as we does not use cross-scale embedding layer. Compared with the extracted tokens in CrossFormer, the tokens from our sparse attention can represent the real pixel in original feature map. The interactions of tokens in our module achieve the real spatial sparsity. By contrast, the sparsity of long-distance attention in CrossFormer is temporary as the feature map gradually shrinks.

## 2.2 EXPERIMENTAL VERIFICATION

Furthermore, we provide comparative experiments to demonstrate that the model design of CrossFormer with CEL and LSDA is not suitable for low-level vision tasks. We want to validate that our model design is better. Detailed introductions are provided and experimental results are shown in Tab. 1 and Fig. 3(Left).

**Experimental Settings.** In detail, we use SwinIR Liang et al. (2021) as backbone and use the core components of CrossFormer to replace the modules in SwinIR. We change the pyramid structure of CrossFormer to make a fair comparison. Meanwhile, we set the related parameters of CrossFormer and ART the same. In detail, we set the window size and the interval size to 8. The number of Transformer blocks in each residual group are 6. We also use 6 successive residual groups. The MLP ratio is 2. We train these two models under super-resolution  $\times 2$  task. We use DIV2K Timofte et al. (2017) and Flickr2K Lim et al. (2017) as training data, Set5 Bevilacqua et al. (2012), Set14 Zeyde et al. (2010), B100 Martin et al. (2001), Urban100 Huang et al. (2015), and Manga109 Matsui et al. (2017) as testing data, which are consistent with SwinIR.

**Convergence Analyses.** We train these two models for close to 300k iterations. In Fig. 3(Left), we show the validation curves of CrossFormer and our ART-S with validation dataset as Set5. We can see that the convergence of our ART-S is faster than CrossFormer. This result shows that better performance is achieved by our ART-S. Therefore, the CrossFormer is validated to be not suitable for low-level vision task.

**Quantitative Comparisons.** Table 1 shows the PSNR/SSIM of CrossFormer and our ART-S. We can see that CrossFormer achieves poor performance in solving image SR. The long-distance attention modules in CrossFormer focus on cross-scale features and learn more semantic-level information. However, the multi-scale features are not necessary in restoring HR images. By contrast, the sparse attention modules in our network focus on pixel-level information so that our method can achieve better performance.

## 3 EXPERIMENTS ON REAL IMAGE DENOISING

We conduct experiments on another image restoration task to show the superiority of our method. In practice, we employ our method to solve Real Image Denoising problems. We give detailed introduction as follows.

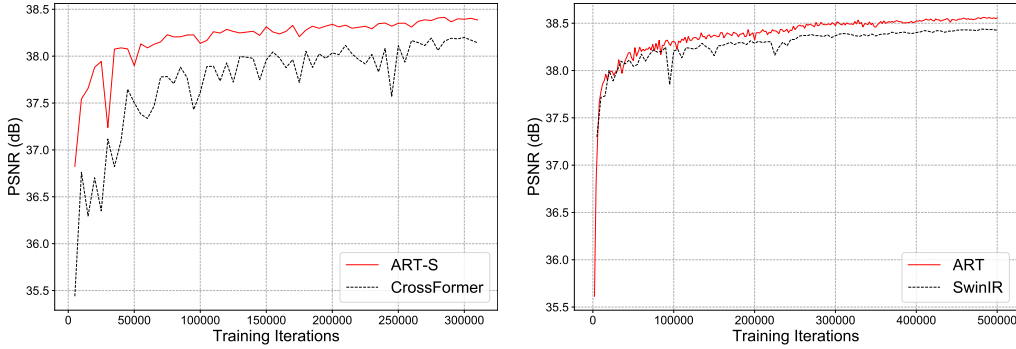

Figure 3: Convergence Analyses on  $\times 2$  SR. **Left:** comparisons of CrossFormer and ART-S with training 300k iterations. **Right:** comparisons of SwinIR and ART with training 500k iterations.

### Results for denoising on sRGB Data

Search:

| Name              | Uses VST | Denoised on | PSNR on sRGB | SSIM on sRGB | Details                                                                                                                                                                 |
|-------------------|----------|-------------|--------------|--------------|-------------------------------------------------------------------------------------------------------------------------------------------------------------------------|
| ART-300k-ensemble | 0        | srgb        | 40.0775      | 0.9558       |   |
| ART-300K          | 0        | srgb        | 40.0462      | 0.9557       |   |

Figure 4: Screenshot of the testing result of our ART in the DND testing website.

**Experimental Settings.** To make a fair comparison, we utilize the model architecture of Restormer [Zamir et al. \(2022\)](#) to train our ART. We use the proposed dense and sparse attention blocks to replace the Transformer blocks in Restormer. We keep other model components the same with Restormer. We also provide the implementation details. We use a 4-level symmetric encoder-decoder with the number of Transformer blocks as [4, 6, 6, 8], from level-1 to level-4. The blocks number in refinement stage is 4. The number of attention heads is [1, 2, 4, 8] and the MLP expansion ratio is 4 (2.66 in Restormer). We set the interval size in four successive encoders as (32, 16, 8, 4). For the dense attention block, we set the window size to 8.

We train our model under the same training conditions with Restormer. We use AdamW optimizer with  $\beta_1=0.9$  and  $\beta_2=0.99$ . The initial learning rate is  $3 \times 10^{-4}$ . According to the cosine annealing [Loshchilov & Hutter \(2017\)](#), it gradually decreases to  $1 \times 10^{-6}$ . The model is trained within 300K iterations. Note that the progressive learning proposed by Restormer is also employed. We train ART on 320 high-resolution images from SIDD [Abdelhamed et al. \(2018\)](#) datasets. The testing datasets include SIDD test set and DND dataset [Plotz & Roth \(2017\)](#).

**Quantitative Comparisons.** We compare our ART with state-of-the-art methods including MIR-Net [Zamir et al. \(2020\)](#), Uformer [Wang et al. \(2022b\)](#), and Restormer. In Tab. 2, we can see that our proposed method has comparable performance with existing state-of-the-art models Uformer-B and Restormer. Higher performance is achieved by ART+ using self-ensemble. Besides, the parameter of our ART is smaller than all compared models except Uformer-S. It indicates that our method can also have promising performance in Real Image Denoising.

**Further Analysis.** In fact, our ART model has not been extended to larger model. If our ART has the same model size with Uformer (50.88M), the performance gains will be higher. To confirm the validity of our results, We also show the online test results of ART on the DND [Plotz & Roth \(2017\)](#) in Fig. 4. In conclusion, our proposed method shows strong ability to restore high-quality images in real image denoising.

## 4 EXPERIMENTS ON GAUSSIAN GRAYSCALE IMAGE DENOISING

We also employ our method to solve Gaussian grayscale image denoising task. The training datasets are same with the task of Gaussian color image denoising. We use Set12 [Zhang et al. \(2017a\)](#), BSD68 [Martin et al. \(2001\)](#), and Urban100 [Huang et al. \(2015\)](#) to perform evaluations. We compare our method to recent leading methods quantitatively and visually. We give more details as follows.



| Dataset  | $\sigma$ | BM3D  | DnCNN | IRCNN | FFDNet | RNAN  | RDN   | DRUNet | SwinIR | Restormer | ART   | ART+  |
|----------|----------|-------|-------|-------|--------|-------|-------|--------|--------|-----------|-------|-------|
| Set12    | 15       | 32.37 | 32.86 | 32.76 | 32.75  | N/A   | N/A   | 33.25  | 33.36  | 33.42     | 33.42 | 33.44 |
|          | 25       | 29.97 | 30.44 | 30.37 | 30.43  | N/A   | N/A   | 30.94  | 31.01  | 31.08     | 31.10 | 31.12 |
|          | 50       | 26.72 | 27.18 | 27.12 | 27.32  | 27.70 | 27.60 | 27.90  | 27.91  | 28.00     | 28.02 | 28.05 |
| BSD68    | 15       | 31.08 | 31.73 | 31.63 | 31.63  | N/A   | N/A   | 31.91  | 31.97  | 31.96     | 31.97 | 32.00 |
|          | 25       | 28.57 | 29.23 | 29.15 | 29.19  | N/A   | N/A   | 29.48  | 29.50  | 29.52     | 29.53 | 29.56 |
|          | 50       | 25.60 | 26.23 | 26.19 | 26.29  | 26.48 | 26.41 | 26.59  | 26.58  | 26.62     | 26.60 | 26.65 |
| Urban100 | 15       | 32.35 | 32.64 | 32.46 | 32.40  | N/A   | N/A   | 33.44  | 33.70  | 33.79     | 33.89 | 33.98 |
|          | 25       | 29.70 | 29.95 | 29.80 | 29.90  | N/A   | N/A   | 31.11  | 31.30  | 31.46     | 31.68 | 31.78 |
|          | 50       | 25.95 | 26.26 | 26.22 | 26.50  | 27.65 | 27.40 | 27.96  | 27.98  | 28.29     | 28.56 | 28.67 |

Table 3: PSNR (dB) comparisons for Gaussian grayscale image denoising on three benchmark datasets. The best and second best results are in red and blue.

| Method                                        | Parameters (M) | Mult-Adds (G) | PSNR on Urban100 (dB) |
|-----------------------------------------------|----------------|---------------|-----------------------|
| SwinIR <a href="#">Liang et al. (2021)</a>    | 11.50          | 201           | 27.98                 |
| Restormer <a href="#">Zamir et al. (2022)</a> | 26.11          | 39            | 28.29                 |
| ART (ours)                                    | 20.82          | 44            | 28.56                 |

Table 4: Model size comparisons. PSNR scores are reported by testing on Gaussian gray image denoising ( $\sigma=50$ ). Input size is  $1 \times 128 \times 128$  for Mult-Adds calculation.

**Experimental Settings.** We also utilize the model architecture of Restormer [Zamir et al. \(2022\)](#) to train our ART. We use U-net structure to design our model and train it on the codebase of Restormer. The training settings have been introduced in Sec. 3. We declare some differences here. We adjust some parameters in ART. We set the window size to 16 and the initial interval size to 8. As the stage grows, the interval size is reduced by half. To make fair comparisons, we keep the same layers number in encoder-decoder module and MLP expansion ratio with Restormer, which are [4,6,6,8] and 2.66, respectively.

**Quantitative Comparisons.** We compare our ART with state-of-the-art methods including BM3D [Dabov et al. \(2007\)](#), IRCNN [Zhang et al. \(2017b\)](#), FFDNet [Zhang et al. \(2018a\)](#), DnCNN [Zhang et al. \(2017a\)](#), RNAN [Zhang et al. \(2019\)](#), RDN [Zhang et al. \(2020\)](#), DRUNet [Zhang et al. \(2021a\)](#), SwinIR [Liang et al. \(2021\)](#), and Restormer [Zamir et al. \(2022\)](#). From Table 3, we can see that our proposed ART achieves better performance than existing state-of-the-art methods, including CNN-based and Transformer-based networks. Specifically, our ART yields 0.58 dB and 0.27 dB performance gain over SwinIR and Restormer, respectively, on Urban100 with noise level  $\sigma=50$ . Higher performance is achieved by ART+ using self-ensemble. It is worth mentioning that our ART has comparable Mult-Adds with Restormer but  $1.25 \times$  fewer parameters. It indicates that our method can also have impressive performance in Gaussian grayscale image Denoising.

**Model Size Comparisons.** Table 4 provides comparisons of parameters number and Mult-Adds. We mainly compare our ART to recent leading Transformer-based methods including SwinIR and Restormer. We calculate the Mult-Adds assuming that the input size is  $1 \times 128 \times 128$ . We find that our ART enjoys very low Mult-Adds when compared to SwinIR. Compared to Restormer, our method has comparable Mult-Adds but less model parameters. It is seen that our ART can achieve the best performance among them. It indicates that our method owns promising computational and memory efficiency while obtaining promising performance.

**Visual Comparisons.** We also provide numerous visual comparisons with recent state-of-the-art methods on Gaussian grayscale image denoising with noise level  $\sigma=50$ . We show these visual results in Fig. 8-10. As we can see, our proposed ART can obtain visually pleasing results when compared to other methods. Especially, compared to SwinIR and Restormer, our ART can restore more high-frequency components. It indicates that our ART with a U-Net structure can also achieve promising denoising results. In conclusion, our method share a similar model architecture with Restormer and owns comparable computational cost and less model parameters. However, our ART can outperform Restormer both quantitatively and visually.

## 5 ADDITIONAL EXPERIMENTAL RESULTS

We provide more quantitative and visual comparisons about our proposed model as follows.

**Quantitative Comparisons.** Table 5 shows quantitative comparisons for  $\times 2$ ,  $\times 3$ , and  $\times 4$  image super-resolution (SR). All the results are provided by publicly available data. We compare our ART

with 16 state-of-art methods: EDSR Lim et al. (2017), SRMDNF Zhang et al. (2018b), D-DBPN Haris et al. (2018), RDN Zhang et al. (2020), RCAN Zhang et al. (2018c), SAN Dai et al. (2019), SRFBN Li et al. (2019), HAN Niu et al. (2020), IGNN Zhou et al. (2020), CSNLN Mei et al. (2020), RFANet Liu et al. (2020), NLSA Mei et al. (2021), CRAN Zhang et al. (2021b), DFSA Magid et al. (2021), IPT Chen et al. (2021), and SwinIR Liang et al. (2021). Symbol “+” means that results are produced with self-ensemble Lim et al. (2017) in test phase. Note that DFSA Magid et al. (2021) only provides self-ensemble scores. As we can see, our ART achieves the best performance on all the benchmark datasets across all scale factors. ART+ gains even better results using self-ensemble. Besides, ART-S has comparable mode size with SwinIR and also performs outstandingly. It is mainly because our proposed models have stronger representation ability than SwinIR.

**Convergence Analyses.** We provide the validation curve comparisons of our ART and SwinIR in Fig. 3(Right). We keep the training settings the same and the total training iterations are 500k. We report the validation results on Set5 based on the  $\times 2$  SR task. As we can see, our ART achieves better performance than SwinIR. It further reveals that our proposed method has stronger global representation ability by using sparse attention. Thus, it outperforms other Transformer-based methods mainly using dense attention.

**Visual Comparisons.** We provide more visual comparisons. Figures 5 and 6 show some challenging examples for ( $\times 4$ ) image super-resolution (SR). As we can see, most of previous state-of-the-art SR methods suffer from heavy blurring artifacts and have difficulty in recovering high-frequency details. Taking “image\_008” and “image\_076” as an example, all the compared methods have heavy blurring artifacts. While, our ART is able to alleviate blurring artifacts to some degree while recovering more details. Besides, in “image\_047” and “image\_059”, our ART can reconstruct more detailed lines. However, all the compared methods are hard to deal with heavy blurring and thus fail to recover crisp lines. These comparisons indicate that previous leading SR methods have limited ability to restore high-quality images when handling some challenging cases. On the other hand, our proposed ART can obtain visually pleasing results and recover more high-frequency details.

Figure 7 shows visual comparisons of some challenging examples for color image denoising with noise level 50. As we can see, some previous denoising methods have difficulty in removing heavy noise corruption. While, our proposed ART can reserve detailed textures and high-frequency components after denoising. For example, in “image\_008” and “image\_060”, all the compared methods suffer from heavy noise corruption. However, our ART can remove these noise corruption to some degree and restore clean and crisp images.

Figures 8-10 show visual comparisons of some challenging examples for grayscale image denoising with noise level 50. Results are obtained by testing on Urban100. We make comparisons with recent leading CNN-based and Transformer-based methods. As we can see, our ART can achieve better visual results.

## REFERENCES

- Abdelrahman Abdelhamed, Stephen Lin, and Michael S Brown. A high-quality denoising dataset for smartphone cameras. In *CVPR*, 2018. 4
- Marco Bevilacqua, Aline Roumy, Christine Guillemot, and Marie Line Alberi-Morel. Low-complexity single-image super-resolution based on nonnegative neighbor embedding. In *BMVC*, 2012. 3
- Hanting Chen, Yunhe Wang, Tianyu Guo, Chang Xu, Yiping Deng, Zhenhua Liu, Siwei Ma, Chunjing Xu, Chao Xu, and Wen Gao. Pre-trained image processing transformer. In *CVPR*, 2021. 6, 8
- Kostadin Dabov, Alessandro Foi, Vladimir Katkovnik, and Karen O. Egiazarian. Color image denoising via sparse 3d collaborative filtering with grouping constraint in luminance-chrominance space. In *ICIP*, 2007. 5
- Tao Dai, Jianrui Cai, Yongbing Zhang, Shu-Tao Xia, and Lei Zhang. Second-order attention network for single image super-resolution. In *CVPR*, 2019. 6, 8
- Muhammad Haris, Greg Shakhnarovich, and Norimichi Ukita. Deep back-projection networks for super-resolution. In *CVPR*, 2018. 6, 8
- Jia-Bin Huang, Abhishek Singh, and Narendra Ahuja. Single image super-resolution from transformed self-exemplars. In *CVPR*, 2015. 3, 4

- Zhen Li, Jinglei Yang, Zheng Liu, Xiaomin Yang, Gwanggil Jeon, and Wei Wu. Feedback network for image super-resolution. In *CVPR*, 2019. 6, 8
- Jingyun Liang, Jiezhong Cao, Guolei Sun, Kai Zhang, Luc Van Gool, and Radu Timofte. Swinir: Image restoration using swin transformer. In *ICCVW*, 2021. 3, 5, 6, 8
- Bee Lim, Sanghyun Son, Heewon Kim, Seungjun Nah, and Kyoung Mu Lee. Enhanced deep residual networks for single image super-resolution. In *CVPRW*, 2017. 2, 3, 6, 8
- Jie Liu, Wenjie Zhang, Yuting Tang, Jie Tang, and Gangshan Wu. Residual feature aggregation network for image super-resolution. In *CVPR*, 2020. 6, 8
- Ze Liu, Yutong Lin, Yue Cao, Han Hu, Yixuan Wei, Zheng Zhang, Stephen Lin, and Baining Guo. Swin transformer: Hierarchical vision transformer using shifted windows. In *ICCV*, 2021. 2
- Ilya Loshchilov and Frank Hutter. Sgdr: Stochastic gradient descent with warm restarts. In *ICLR*, 2017. 4
- Salma Abdel Magid, Yulun Zhang, Donglai Wei, Won-Dong Jang, Zudi Lin, Yun Fu, and Hanspeter Pfister. Dynamic high-pass filtering and multi-spectral attention for image super-resolution. In *ICCV*, 2021. 6, 8
- David Martin, Charless Fowlkes, Doron Tal, and Jitendra Malik. A database of human segmented natural images and its application to evaluating segmentation algorithms and measuring ecological statistics. In *ICCV*, 2001. 3, 4
- Yusuke Matsui, Kota Ito, Yuji Aramaki, Azuma Fujimoto, Toru Ogawa, Toshihiko Yamasaki, and Kiyoharu Aizawa. Sketch-based manga retrieval using manga109 dataset. *Multimedia Tools and Applications*, 2017. 3
- Yiqun Mei, Yuchen Fan, Yuqian Zhou, Lichao Huang, Thomas S Huang, and Humphrey Shi. Image super-resolution with cross-scale non-local attention and exhaustive self-exemplars mining. In *CVPR*, 2020. 6, 8
- Yiqun Mei, Yuchen Fan, and Yuqian Zhou. Image super-resolution with non-local sparse attention. In *CVPR*, 2021. 6, 8
- Ben Niu, Weilei Wen, Wenqi Ren, Xiangde Zhang, Lianping Yang, Shuzhen Wang, Kaihao Zhang, Xiaochun Cao, and Haifeng Shen. Single image super-resolution via a holistic attention network. In *ECCV*, 2020. 6, 8
- Tobias Plotz and Stefan Roth. Benchmarking denoising algorithms with real photographs. In *CVPR*, 2017. 4
- Radu Timofte, Eirikur Agustsson, Luc Van Gool, Ming-Hsuan Yang, Lei Zhang, Bee Lim, Sanghyun Son, Heewon Kim, Seungjun Nah, Kyoung Mu Lee, et al. Ntire 2017 challenge on single image super-resolution: Methods and results. In *CVPRW*, 2017. 2, 3
- Wenxiao Wang, Lu Yao, Long Chen, Binbin Lin, Deng Cai, Xiaofei He, and Wei Liu. Crossformer: A versatile vision transformer hinging on cross-scale attention. In *ICLR*, 2022a. 2
- Zhendong Wang, Xiaodong Cun, Jianmin Bao, Wengang Zhou, Jianzhuang Liu, and Houqiang Li. Uformer: A general u-shaped transformer for image restoration. In *CVPR*, 2022b. 4
- Syed Waqas Zamir, Aditya Arora, Salman Khan, Munawar Hayat, Fahad Shahbaz Khan, Ming-Hsuan Yang, and Ling Shao. Learning enriched features for real image restoration and enhancement. In *ECCV*, 2020. 4
- Syed Waqas Zamir, Aditya Arora, Salman H. Khan, Munawar Hayat, Fahad Shahbaz Khan, and Ming-Hsuan Yang. Restormer: Efficient transformer for high-resolution image restoration. In *CVPR*, 2022. 4, 5
- Roman Zeyde, Michael Elad, and Matan Protter. On single image scale-up using sparse-representations. In *Proc. 7th Int. Conf. Curves Surf.*, 2010. 3
- Kai Zhang, Wangmeng Zuo, Yunjin Chen, Deyu Meng, and Lei Zhang. Beyond a gaussian denoiser: Residual learning of deep cnn for image denoising. *TIP*, 2017a. 4, 5
- Kai Zhang, Wangmeng Zuo, Shuhang Gu, and Lei Zhang. Learning deep cnn denoiser prior for image restoration. In *CVPR*, 2017b. 5
- Kai Zhang, Wangmeng Zuo, and Lei Zhang. Ffdnet: Toward a fast and flexible solution for cnn-based image denoising. *TIP*, 2018a. 5
- Kai Zhang, Wangmeng Zuo, and Lei Zhang. Learning a single convolutional super-resolution network for multiple degradations. In *CVPR*, 2018b. 6, 8

Kai Zhang, Yawei Li, Wangmeng Zuo, Lei Zhang, Luc Van Gool, and Radu Timofte. Plug-and-play image restoration with deep denoiser prior. *TPAMI*, 2021a. **5**

Yulun Zhang, Kunpeng Li, Kai Li, Lichen Wang, Bineng Zhong, and Yun Fu. Image super-resolution using very deep residual channel attention networks. In *ECCV*, 2018c. **6, 8**

Yulun Zhang, Kunpeng Li, Kai Li, Bineng Zhong, and Yun Fu. Residual non-local attention networks for image restoration. In *ICLR*, 2019. **5**

Yulun Zhang, Yapeng Tian, Yu Kong, Bineng Zhong, and Yun Fu. Residual dense network for image restoration. *TPAMI*, 2020. **5, 6, 8**

Yulun Zhang, Donglai Wei, Can Qin, Huan Wang, Hanspeter Pfister, and Yun Fu. Context reasoning attention network for image super-resolution. In *ICCV*, 2021b. **6, 8**

Shangchen Zhou, Jiawei Zhang, Wangmeng Zuo, and Chen Change Loy. Cross-scale internal graph neural network for image super-resolution. In *NeurIPS*, 2020. **6, 8**

| Method                      | Scale | Set5         |               | Set14        |               | B100         |               | Urban100     |               | Manga109     |               |
|-----------------------------|-------|--------------|---------------|--------------|---------------|--------------|---------------|--------------|---------------|--------------|---------------|
|                             |       | PSNR         | SSIM          |
| Bicubic                     | ×2    | 33.66        | 0.9299        | 30.24        | 0.8688        | 29.56        | 0.8431        | 26.88        | 0.8403        | 30.80        | 0.9339        |
| EDSR Lim et al. (2017)      | ×2    | 38.11        | 0.9602        | 33.92        | 0.9195        | 32.32        | 0.9013        | 32.93        | 0.9351        | 39.10        | 0.9773        |
| D-DBPN Haris et al. (2018)  | ×2    | 38.09        | 0.9600        | 33.85        | 0.9190        | 32.27        | 0.9000        | 32.55        | 0.9324        | 38.89        | 0.9775        |
| SRMDNF Zhang et al. (2018b) | ×2    | 37.79        | 0.9601        | 33.32        | 0.9159        | 32.05        | 0.8985        | 31.33        | 0.9204        | 38.07        | 0.9761        |
| RDN Zhang et al. (2020)     | ×2    | 38.24        | 0.9614        | 34.01        | 0.9212        | 32.34        | 0.9017        | 32.89        | 0.9353        | 39.18        | 0.9780        |
| RCAN Zhang et al. (2018c)   | ×2    | 38.27        | 0.9614        | 34.12        | 0.9216        | 32.41        | 0.9027        | 33.34        | 0.9384        | 39.44        | 0.9786        |
| SAN Dai et al. (2019)       | ×2    | 38.31        | 0.9620        | 34.07        | 0.9213        | 32.42        | 0.9028        | 33.10        | 0.9370        | 39.32        | 0.9792        |
| SRFBN Li et al. (2019)      | ×2    | 38.11        | 0.9609        | 33.82        | 0.9196        | 32.29        | 0.9010        | 32.62        | 0.9328        | 39.08        | 0.9779        |
| HAN Niu et al. (2020)       | ×2    | 38.27        | 0.9614        | 34.16        | 0.9217        | 32.41        | 0.9027        | 33.35        | 0.9385        | 39.46        | 0.9785        |
| IGNN Zhou et al. (2020)     | ×2    | 38.24        | 0.9613        | 34.07        | 0.9217        | 32.41        | 0.9025        | 33.23        | 0.9383        | 39.35        | 0.9786        |
| CSNLN Mei et al. (2020)     | ×2    | 38.28        | 0.9616        | 34.12        | 0.9223        | 32.40        | 0.9024        | 33.25        | 0.9386        | 39.37        | 0.9785        |
| RFA Net Liu et al. (2020)   | ×2    | 38.26        | 0.9615        | 34.16        | 0.9220        | 32.41        | 0.9026        | 33.33        | 0.9389        | 39.44        | 0.9783        |
| NLSA Mei et al. (2021)      | ×2    | 38.34        | 0.9618        | 34.08        | 0.9231        | 32.43        | 0.9027        | 33.42        | 0.9394        | 39.59        | 0.9789        |
| CRAN Zhang et al. (2021b)   | ×2    | 38.31        | 0.9617        | 34.22        | 0.9232        | 32.44        | 0.9029        | 33.43        | 0.9394        | 39.75        | 0.9793        |
| DFSA+ Magid et al. (2021)   | ×2    | 38.38        | 0.9620        | 34.33        | 0.9232        | 32.50        | 0.9036        | 33.66        | 0.9412        | 39.98        | 0.9798        |
| IPT Chen et al. (2021)      | ×2    | 38.37        | N/A           | 34.43        | N/A           | 32.48        | N/A           | 33.76        | N/A           | N/A          | N/A           |
| SwinIR Liang et al. (2021)  | ×2    | 38.42        | 0.9623        | 34.46        | 0.9250        | 32.53        | 0.9041        | 33.81        | 0.9427        | 39.92        | 0.9797        |
| ART-S (ours)                | ×2    | 38.48        | 0.9625        | 34.50        | 0.9258        | 32.53        | 0.9043        | 34.02        | 0.9437        | 40.11        | 0.9804        |
| ART (ours)                  | ×2    | <b>38.56</b> | <b>0.9629</b> | <b>34.59</b> | <b>0.9267</b> | <b>32.58</b> | <b>0.9048</b> | <b>34.30</b> | <b>0.9452</b> | <b>40.24</b> | <b>0.9808</b> |
| ART+ (ours)                 | ×2    | <b>38.59</b> | <b>0.9630</b> | <b>34.68</b> | <b>0.9269</b> | <b>32.60</b> | <b>0.9050</b> | <b>34.41</b> | <b>0.9457</b> | <b>40.33</b> | <b>0.9810</b> |
| Bicubic                     | ×3    | 30.39        | 0.8682        | 27.55        | 0.7742        | 27.21        | 0.7385        | 24.46        | 0.7349        | 26.95        | 0.8556        |
| EDSR Lim et al. (2017)      | ×3    | 34.65        | 0.9280        | 30.52        | 0.8462        | 29.25        | 0.8093        | 28.80        | 0.8653        | 34.17        | 0.9476        |
| SRMDNF Zhang et al. (2018b) | ×3    | 34.12        | 0.9254        | 30.04        | 0.8382        | 28.97        | 0.8025        | 27.57        | 0.8398        | 33.00        | 0.9403        |
| RDN Zhang et al. (2020)     | ×3    | 34.71        | 0.9296        | 30.57        | 0.8468        | 29.26        | 0.8093        | 28.80        | 0.8653        | 34.13        | 0.9484        |
| RCAN Zhang et al. (2018c)   | ×3    | 34.74        | 0.9299        | 30.65        | 0.8482        | 29.32        | 0.8111        | 29.09        | 0.8702        | 34.44        | 0.9499        |
| SAN Dai et al. (2019)       | ×3    | 34.75        | 0.9300        | 30.59        | 0.8476        | 29.33        | 0.8112        | 28.93        | 0.8671        | 34.30        | 0.9494        |
| SRFBN Li et al. (2019)      | ×3    | 34.70        | 0.9292        | 30.51        | 0.8461        | 29.24        | 0.8084        | 28.73        | 0.8641        | 34.18        | 0.9481        |
| HAN Niu et al. (2020)       | ×3    | 34.75        | 0.9299        | 30.67        | 0.8483        | 29.32        | 0.8110        | 29.10        | 0.8705        | 34.48        | 0.9500        |
| IGNN Zhou et al. (2020)     | ×3    | 34.72        | 0.9298        | 30.66        | 0.8484        | 29.31        | 0.8105        | 29.03        | 0.8696        | 34.39        | 0.9496        |
| CSNLN Mei et al. (2020)     | ×3    | 34.74        | 0.9300        | 30.66        | 0.8482        | 29.33        | 0.8105        | 29.13        | 0.8712        | 34.45        | 0.9502        |
| RFA Net Liu et al. (2020)   | ×3    | 34.79        | 0.9300        | 30.67        | 0.8487        | 29.34        | 0.8115        | 29.15        | 0.8720        | 34.59        | 0.9506        |
| NLSA Mei et al. (2021)      | ×3    | 34.85        | 0.9306        | 30.70        | 0.8485        | 29.34        | 0.8117        | 29.25        | 0.8726        | 34.57        | 0.9508        |
| CRAN Zhang et al. (2021b)   | ×3    | 34.80        | 0.9304        | 30.73        | 0.8498        | 29.38        | 0.8124        | 29.33        | 0.8745        | 34.84        | 0.9515        |
| DFSA+ Magid et al. (2021)   | ×3    | 34.92        | 0.9312        | 30.83        | 0.8507        | 29.42        | 0.8128        | 29.44        | 0.8761        | 35.07        | 0.9525        |
| IPT Chen et al. (2021)      | ×3    | 34.81        | N/A           | 30.85        | N/A           | 29.38        | N/A           | 29.49        | N/A           | N/A          | N/A           |
| SwinIR Liang et al. (2021)  | ×3    | 34.97        | 0.9318        | 30.93        | 0.8534        | 29.46        | 0.8145        | 29.75        | 0.8826        | 35.12        | 0.9537        |
| ART-S (ours)                | ×3    | 34.98        | 0.9318        | 30.94        | 0.8530        | 29.45        | 0.8146        | 29.86        | 0.8830        | 35.22        | 0.9539        |
| ART (ours)                  | ×3    | <b>35.07</b> | <b>0.9325</b> | <b>31.02</b> | <b>0.8541</b> | <b>29.51</b> | <b>0.8159</b> | <b>30.10</b> | <b>0.8871</b> | <b>35.39</b> | <b>0.9548</b> |
| ART+ (ours)                 | ×3    | <b>35.11</b> | <b>0.9327</b> | <b>31.05</b> | <b>0.8545</b> | <b>29.53</b> | <b>0.8162</b> | <b>30.22</b> | <b>0.8883</b> | <b>35.51</b> | <b>0.9552</b> |
| Bicubic                     | ×4    | 28.42        | 0.8104        | 26.00        | 0.7027        | 25.96        | 0.6675        | 23.14        | 0.6577        | 24.89        | 0.7866        |
| EDSR Lim et al. (2017)      | ×4    | 32.46        | 0.8968        | 28.80        | 0.7876        | 27.71        | 0.7420        | 26.64        | 0.8033        | 31.02        | 0.9148        |
| D-DBPN Haris et al. (2018)  | ×4    | 32.47        | 0.8980        | 28.82        | 0.7860        | 27.72        | 0.7400        | 26.38        | 0.7946        | 30.91        | 0.9137        |
| SRMDNF Zhang et al. (2018b) | ×4    | 31.96        | 0.8925        | 28.35        | 0.7787        | 27.49        | 0.7337        | 25.68        | 0.7731        | 30.09        | 0.9024        |
| RDN Zhang et al. (2020)     | ×4    | 32.47        | 0.8990        | 28.81        | 0.7871        | 27.72        | 0.7419        | 26.61        | 0.8028        | 31.00        | 0.9151        |
| RCAN Zhang et al. (2018c)   | ×4    | 32.63        | 0.9002        | 28.87        | 0.7889        | 27.77        | 0.7436        | 26.82        | 0.8087        | 31.22        | 0.9173        |
| SAN Dai et al. (2019)       | ×4    | 32.64        | 0.9003        | 28.92        | 0.7888        | 27.78        | 0.7436        | 26.79        | 0.8068        | 31.18        | 0.9169        |
| SRFBN Li et al. (2019)      | ×4    | 32.47        | 0.8983        | 28.81        | 0.7868        | 27.72        | 0.7409        | 26.60        | 0.8015        | 31.15        | 0.9160        |
| HAN Niu et al. (2020)       | ×4    | 32.64        | 0.9002        | 28.90        | 0.7890        | 27.80        | 0.7442        | 26.85        | 0.8094        | 31.42        | 0.9177        |
| IGNN Zhou et al. (2020)     | ×4    | 32.57        | 0.8998        | 28.85        | 0.7891        | 27.77        | 0.7434        | 26.84        | 0.8090        | 31.28        | 0.9182        |
| CSNLN Mei et al. (2020)     | ×4    | 32.68        | 0.9004        | 28.95        | 0.7888        | 27.80        | 0.7439        | 27.22        | 0.8168        | 31.43        | 0.9201        |
| RFA Net Liu et al. (2020)   | ×4    | 32.66        | 0.9004        | 28.88        | 0.7894        | 27.79        | 0.7442        | 26.92        | 0.8112        | 31.41        | 0.9187        |
| NLSA Mei et al. (2021)      | ×4    | 32.59        | 0.9000        | 28.87        | 0.7891        | 27.78        | 0.7444        | 26.96        | 0.8109        | 31.27        | 0.9184        |
| CRAN Zhang et al. (2021b)   | ×4    | 32.72        | 0.9012        | 29.01        | 0.7918        | 27.86        | 0.7460        | 27.13        | 0.8167        | 31.75        | 0.9219        |
| DFSA+ Magid et al. (2021)   | ×4    | 32.79        | 0.9019        | 29.06        | 0.7922        | 27.87        | 0.7458        | 27.17        | 0.8163        | 31.88        | 0.9266        |
| IPT Chen et al. (2021)      | ×4    | 32.64        | N/A           | 29.01        | N/A           | 27.82        | N/A           | 27.26        | N/A           | N/A          | N/A           |
| SwinIR Liang et al. (2021)  | ×4    | 32.92        | 0.9044        | 29.09        | 0.7950        | 27.92        | 0.7489        | 27.45        | 0.8254        | 32.03        | 0.9260        |
| ART-S (ours)                | ×4    | 32.86        | 0.9029        | 29.09        | 0.7942        | 27.91        | 0.7489        | 27.54        | 0.8261        | 32.13        | 0.9263        |
| ART (ours)                  | ×4    | <b>33.04</b> | <b>0.9051</b> | <b>29.16</b> | <b>0.7958</b> | <b>27.97</b> | <b>0.7510</b> | <b>27.77</b> | <b>0.8321</b> | <b>32.31</b> | <b>0.9283</b> |
| ART+ (ours)                 | ×4    | <b>33.07</b> | <b>0.9055</b> | <b>29.20</b> | <b>0.7964</b> | <b>27.99</b> | <b>0.7513</b> | <b>27.89</b> | <b>0.8339</b> | <b>32.45</b> | <b>0.9291</b> |

Table 5: PSNR (dB)/SSIM comparisons for image super-resolution on five benchmark datasets. We color best and second best results in red and blue.



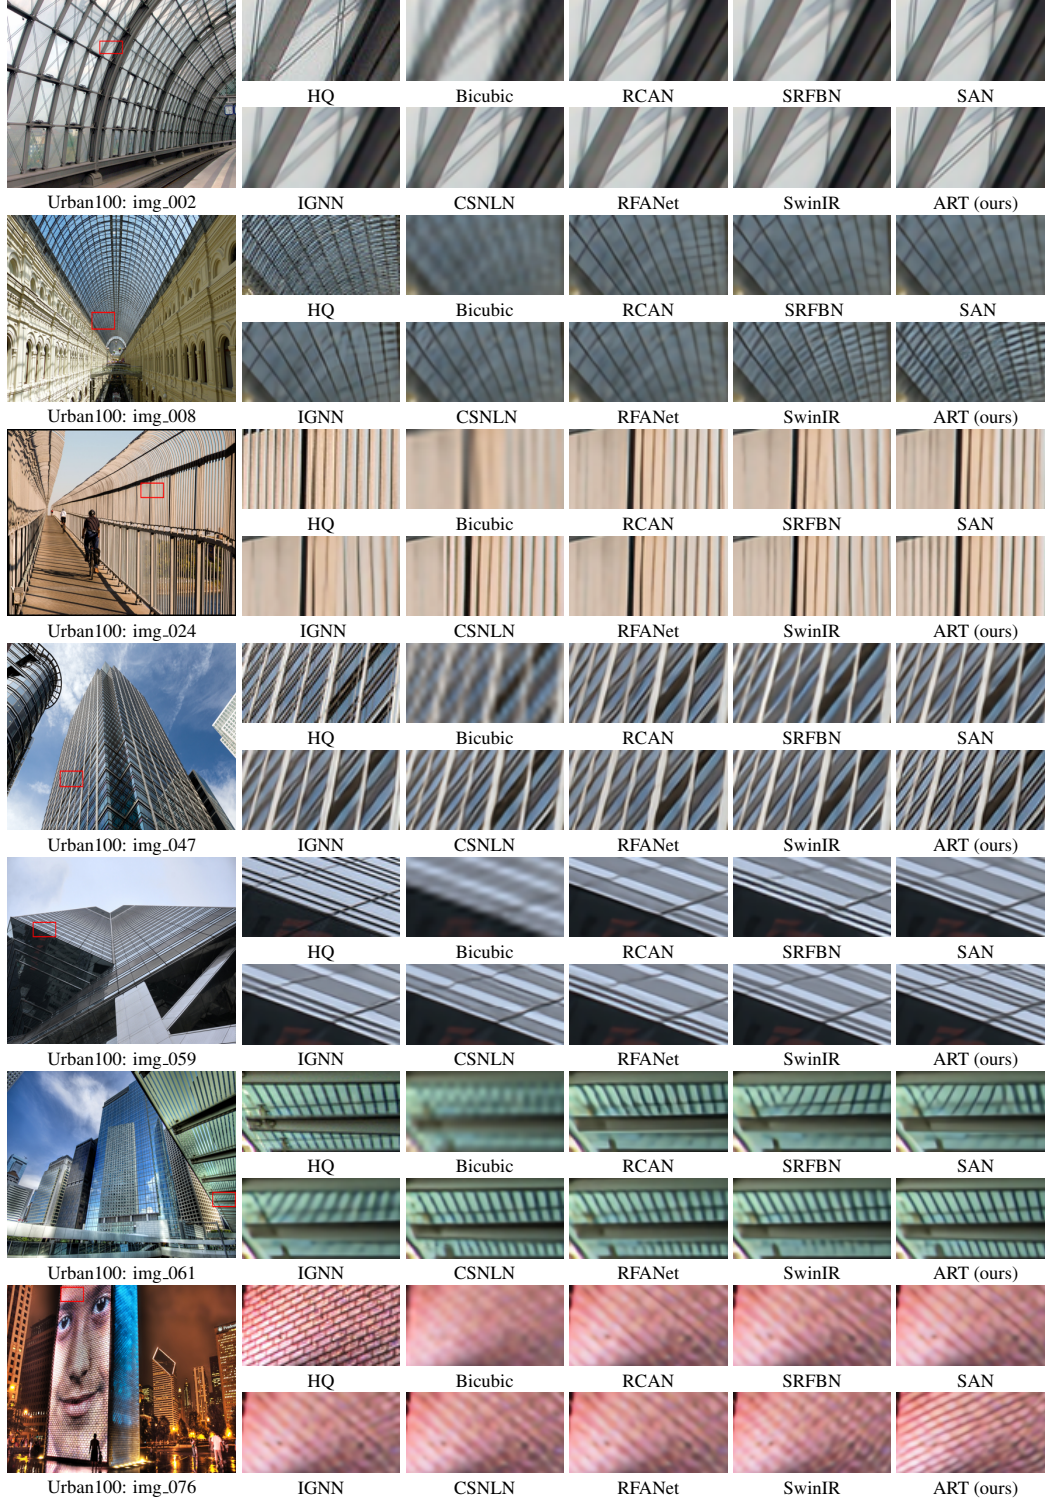Figure 5: Visual comparison ( $\times 4$ ) with image SR networks on Urban100 dataset.



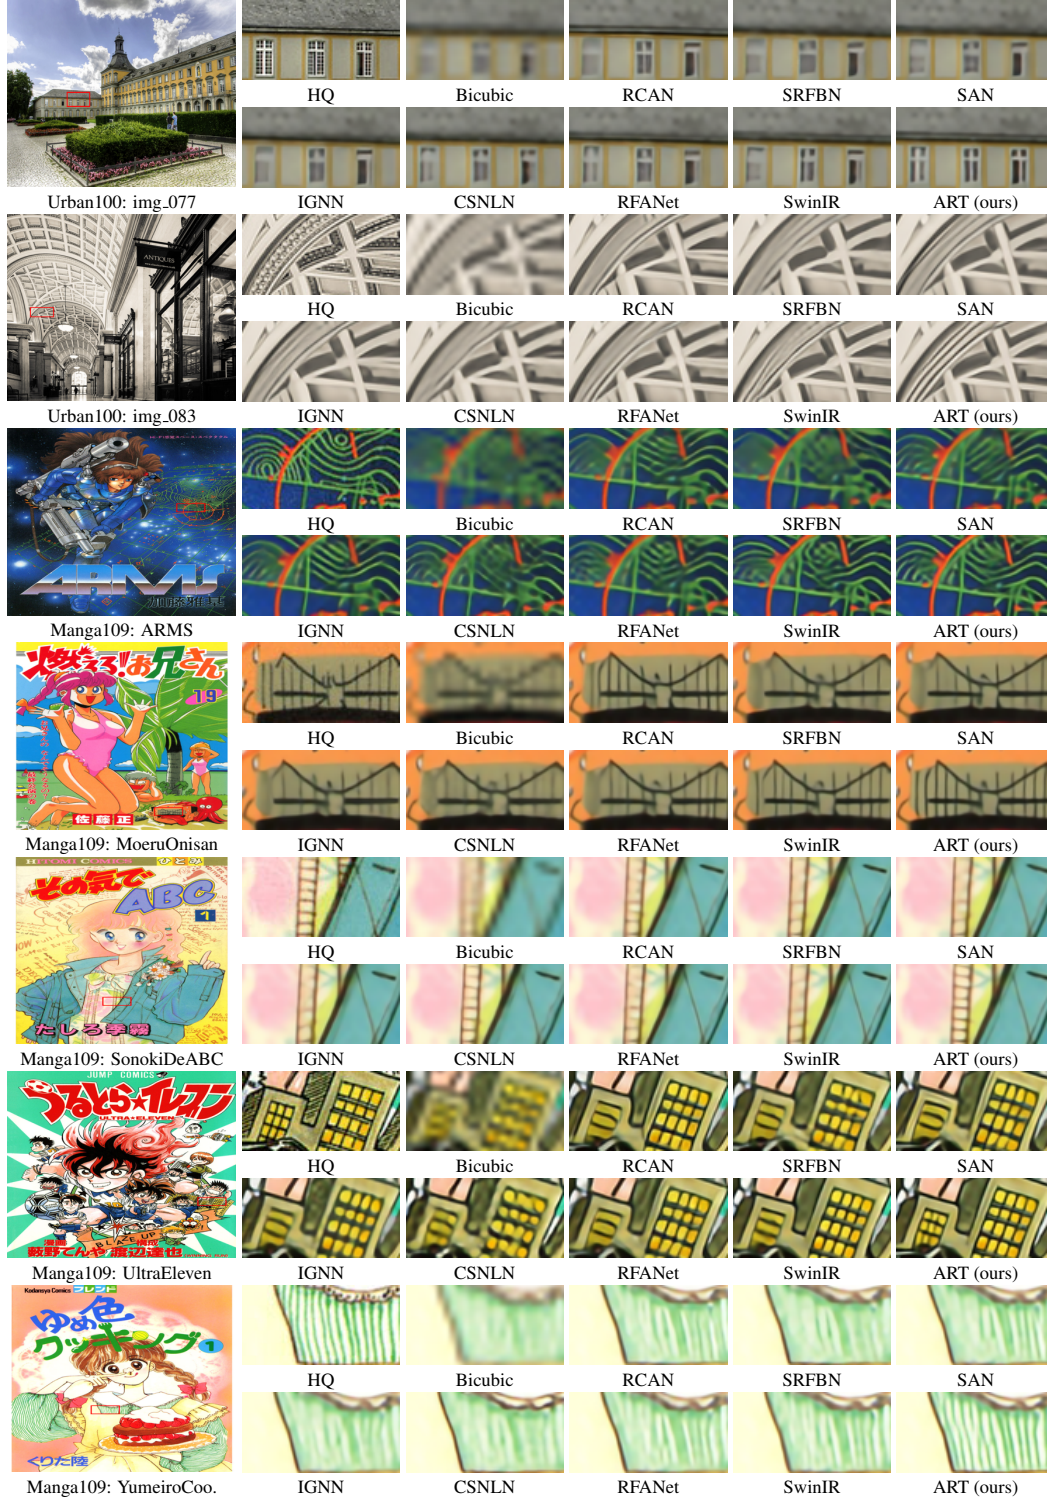Figure 6: Visual comparison ( $\times 4$ ) with image SR networks on Urban100 and Manga109 dataset.

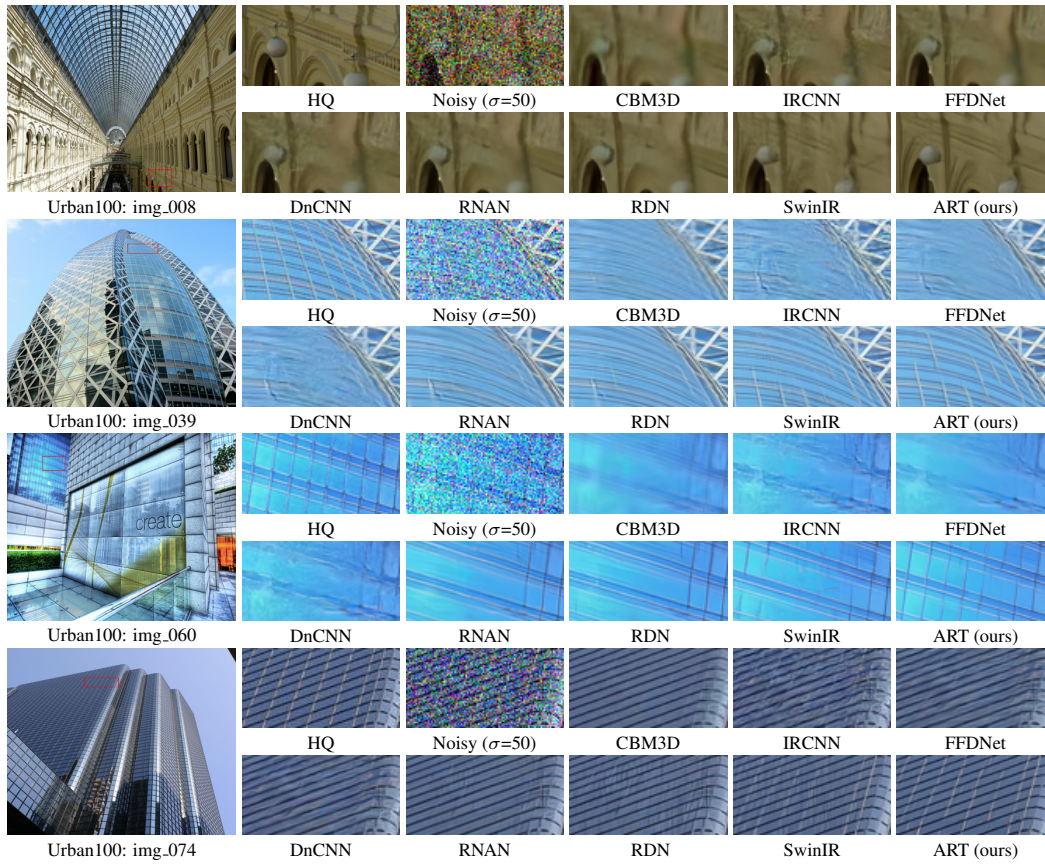Figure 7: Visual comparison ( $\sigma=50$ ) for Gaussian color image denoising on Urban100 dataset.

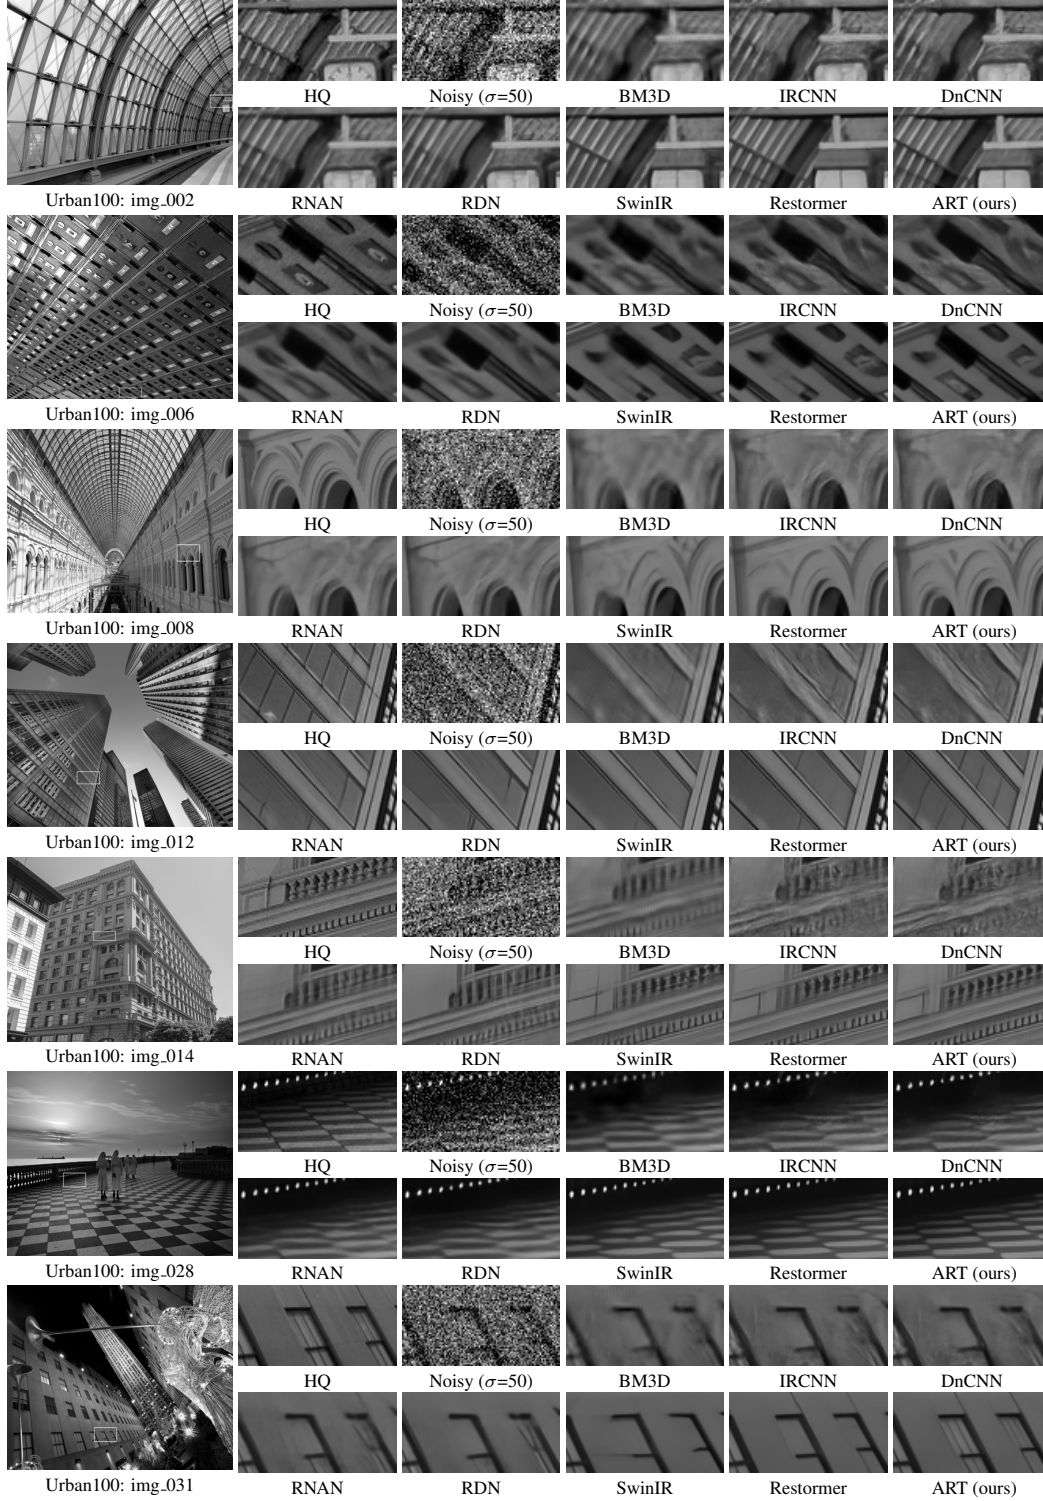Figure 8: Visual comparison ( $\sigma=50$ ) for Gaussian grayscale image denoising on Urban100 dataset.



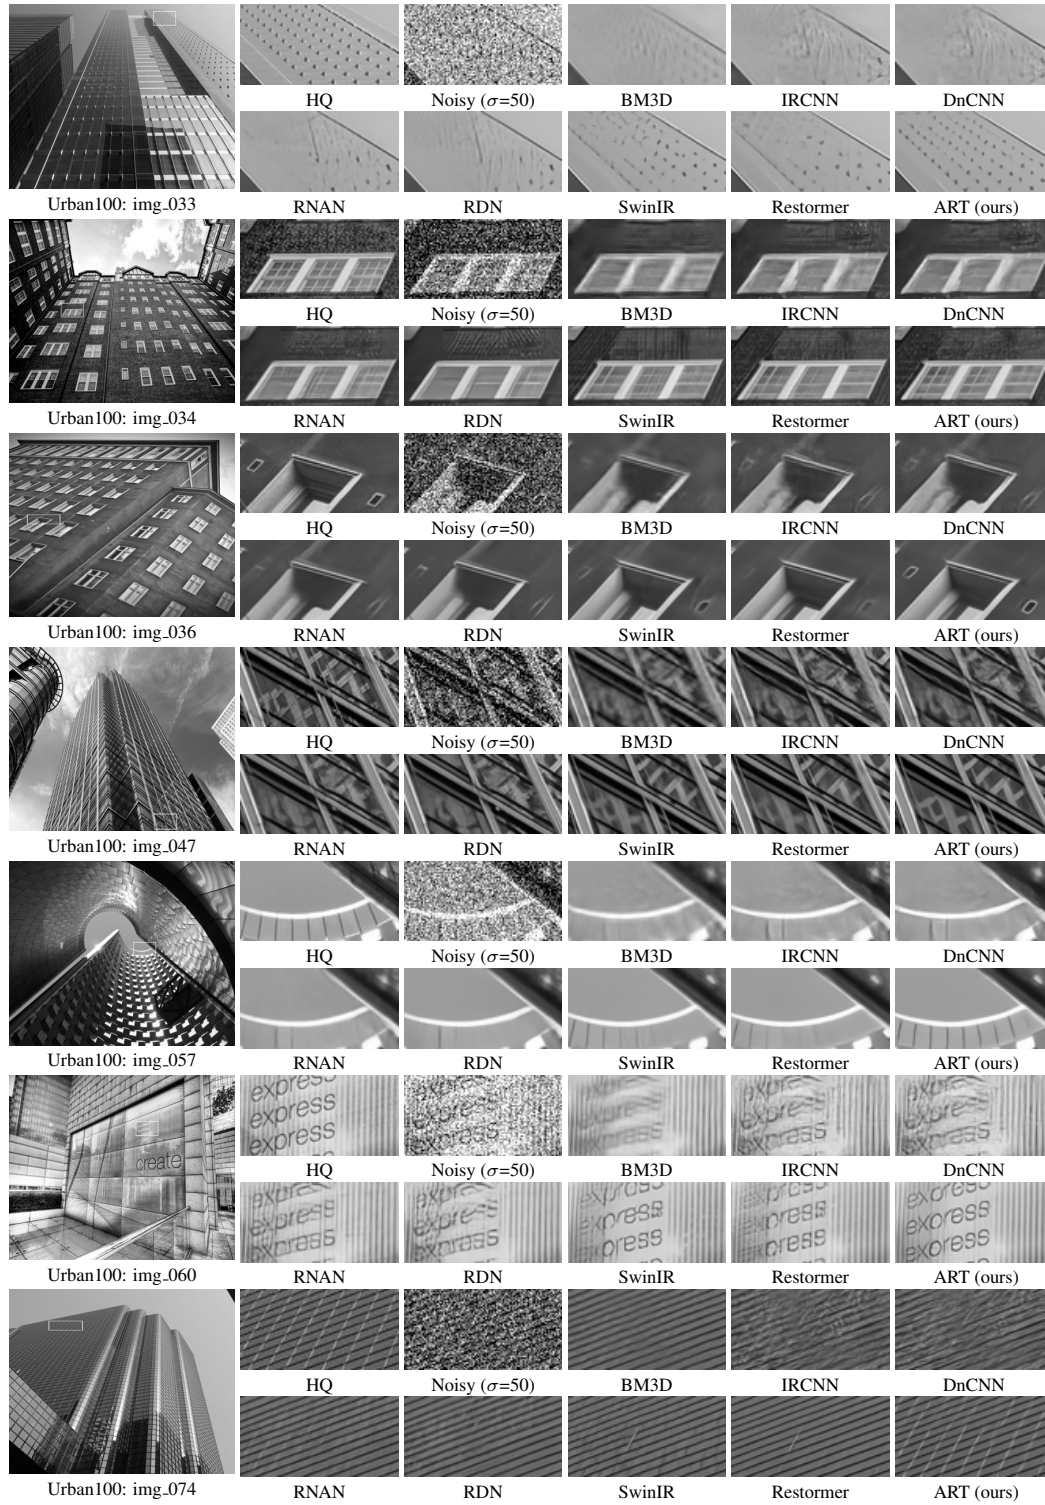Figure 9: Visual comparison ( $\sigma=50$ ) for Gaussian grayscale image denoising on Urban100 dataset.

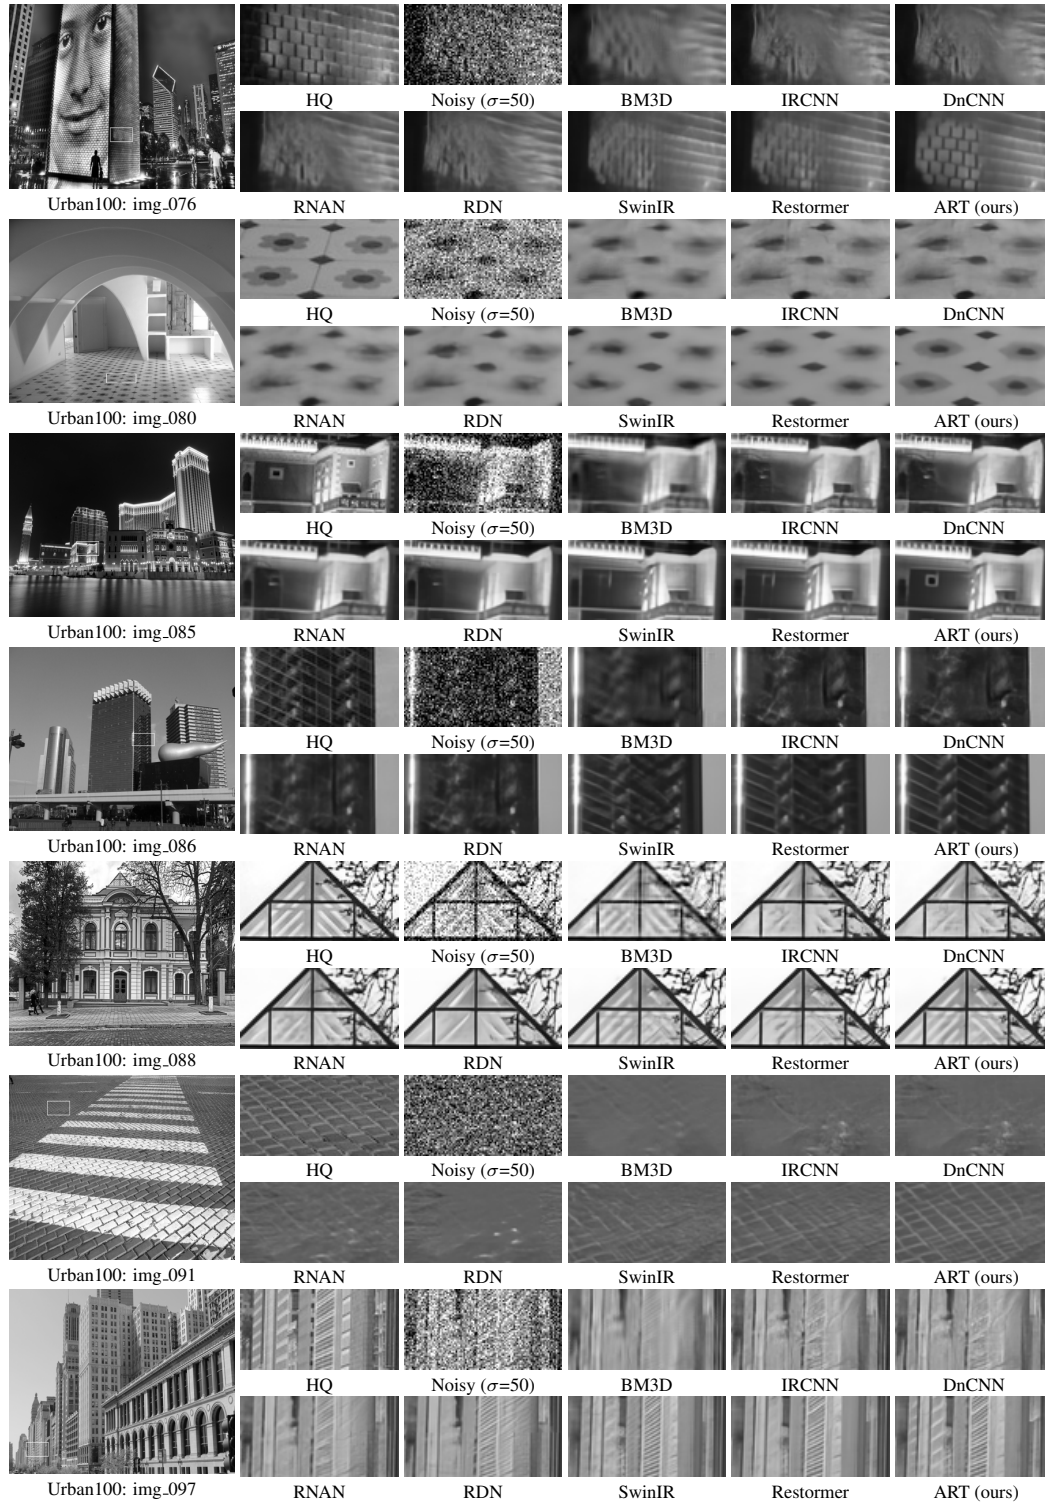Figure 10: Visual comparison ( $\sigma=50$ ) for Gaussian grayscale image denoising on Urban100 dataset.
